# Supplementary material
Source: MDPI journal article supplement (https://www.mdpi.com/2079-9292/11/8/1199)
Supplement: s1 [file s1]

Table S1: SNPs linked to CV disease states

Single nucleotide polymorphisms (SNPs) associated with CVD were used as indicators of predisposed genetic risk for cardiovascular disease. The reference SNP cluster identifier (rs cluster), associated gene, and human chromosome (Chr) location of each SNP used within the algorithm is detailed in the following table along with the ancestral allele and disease-linked variant alleles associated with the given disease states. Disease terms associated with the given rs clusters are Aneurysm (A), Aortic Aneurysm (AA), Arrhythmia (ARR), Arrhythmogenic Right Ventricular Dysplasia (ARVD), Arterial Occlusive Disease (AOC), Brugada Syndrome (BS), Cardiac Amyloidosis (CAM), Cardiac Arrest (CA), Cardiomyopathy (CM), Cardiovascular (CV), Dilated Cardiomyopathy (DCM), Dyslipidemia (DL), Elevated Triglycerides (ET), Familial Dilated Cardiomyopathy (FDCM), Familial Hypercholesterolemia (FHC), High-Density Lipoprotein (HDL), Heart Disease (HD), Heart Valve Disease (HVD), Hemorrhagic Stroke (HS), High Blood Pressure (HBP), Hypercholesterolemia (HC), Hypertension (H), Insulin Resistance (IR), Ischemic Stroke (IS), Long QT Syndrome (LQTS), Low-Density Lipoprotein (LDL), Marfan Syndrome (MS), Mitral (M), Mitral Valve Prolapse (MVP), Noncompaction Cardiomyopathy (NCM), Obesity (O), Prolapse (P), Pulmonary Hypertension (PH), Restrictive Cardiomyopathy (RCM), Short QT Syndrome (SQTS), Stroke (S), and Thrombosis (T).

| Reference SNP Cluster ID | Gene    | Genomic State                                                                                                                                             | Chr | Location    | Ancestral Allele | Variant Allele | Variant Allele | Variant Allele | Variant Allele | Disease      |
|--------------------------|---------|-----------------------------------------------------------------------------------------------------------------------------------------------------------|-----|-------------|------------------|----------------|----------------|----------------|----------------|--------------|
| rs1126742                | CYP4A11 | (C:C) and (C:T) -- higher risk for hypertension ; (T:T) -- normal                                                                                         | 1   | 46,932,824  | A                | G              |                |                |                | IS           |
| rs11591147               | PCSK9   | (G:G) -- normal; (G:T) and (T:T) -- 2-3 fold lower risk of heart disease                                                                                  | 1   | 55,039,974  | G                | A              | T              |                |                | LDL, PH, HDL |
| rs16847548               |         | (C:C) -- 2.6x increased risk for sudden cardiac death in Caucasians; (C:T) -- 1.3x increased risk for sudden cardiac death in Caucasians; (T:T) -- normal | 1   | 162065484   | T                | C              |                |                |                | IS, PH       |
| rs17465637               | MIA3    | (C:C) and (A:C) -- 1.3x higher risk for myocardial infarction; (A:A) -- normal                                                                            | 1   | 222,650,187 | A                | C              | G              | T              |                | CV, IS       |
| rs17672135               | FMN2    | (T:T) -- 1.3x risk of heart disease; (C:C) -- normal                                                                                                      | 1   | 240,282,296 | T                | C              |                |                |                | HDL          |
| rs2820037                |         | (A:T) -- 1.5x higher risk for high blood pressure; (T:T) -- 1.1x higher risk for high blood pressure; (A:A) -- normal                                     | 1   | 239,273,242 | A                | T              |                |                |                | CV           |
| rs3093059                | CRP     | (C:C) -- associated with elevated C-reactive protein levels and hypertension                                                                              | 1   | 159,715,346 | A                | G              |                |                |                | IS           |

| Reference SNP<br>Cluster ID | Gene   | Genomic State                                                                                        | Chr | Location    | Ancestral<br>Allele | Variant<br>Allele | Variant<br>Allele | Variant<br>Allele | Variant<br>Allele | Disease             |
|-----------------------------|--------|------------------------------------------------------------------------------------------------------|-----|-------------|---------------------|-------------------|-------------------|-------------------|-------------------|---------------------|
| rs376923877                 | TNNT2  | (A:G) -- Familial hypertrophic cardiomyopathy (possible); (G:G) -- normal                            | 1   | 201359637   | G                   | A                 | T                 |                   |                   | IS, CV, HVD, M, LDL |
| rs3903239                   | PRRX1  | (C:C) -- higher frequency of atrial fibrillation                                                     | 1   | 170,600,176 | A                   | G                 | T                 |                   |                   | CM                  |
| rs5174                      | LRP8   | (A:G) and (A:A) -- 1.3x increased risk for heart disease; (G:G) -- normal                            | 1   | 53247055    | C                   | T                 |                   |                   |                   | IS                  |
| rs5361                      | SELE   | (C:C) -- 4x increased risk for recurrent venous thromboembolism; (A:A) and (A:C) -- normal           | 1   | 169,731,919 | T                   | G                 |                   |                   |                   | CV, IS              |
| rs55883237                  | OBSCN  | (C:G) -- Left ventricular noncompaction possible (likely?); (G:G) -- normal                          | 1   | 228,374,584 | G                   | A                 | C                 |                   |                   | A                   |
| rs599839                    | PSRC1  | (A:A) and (A:G) -- 1.3x increased risk for heart disease; (G:G) -- normal                            | 1   | 109,279,544 | G                   | A                 | C                 |                   |                   | CV, IS, HD, A, AA   |
| rs6025                      | F5     | (A:A) -- 11.4x higher risk of thrombosis; (A:G) -- 3.5-4.4x risk of thrombosis; (G:G) -- normal      | 1   | 169,549,811 | C                   | T                 |                   |                   |                   | CV, HD, AA, IS      |
| rs63750197                  | PSEN2  | (C:T) -- dilated cardiomyopathy; (C:C) -- normal                                                     | 1   | 226,885,570 | C                   | T                 |                   |                   |                   | A                   |
| rs646776                    | CELSR2 | (A:A) -- 1.2x risk of coronary artery disease                                                        | 1   | 109,275,908 | C                   | T                 |                   |                   |                   | AA, MS              |
| rs699                       | AGT    | (C:C) and (C:T) -- increased risk of hypertension; (T:T) -- normal                                   | 1   | 230,710,048 | A                   | G                 |                   |                   |                   | H, HBP              |
| rs74315379                  | TNNT2  | (A:G) -- Hypertrophic Cardiomyopathy; (C:T) -- Familial Hypertrophic Cardiomyopathy; (C:C) -- normal | 1   | 201,364,336 | G                   | A                 | T                 |                   |                   | CV, LQTS, ARR       |

| Reference SNP<br>Cluster ID | Gene   | Genomic State                                                                                                                                                                                                                          | Chr | Location    | Ancestral<br>Allele | Variant<br>Allele | Variant<br>Allele | Variant<br>Allele | Variant<br>Allele | Disease                         |
|-----------------------------|--------|----------------------------------------------------------------------------------------------------------------------------------------------------------------------------------------------------------------------------------------|-----|-------------|---------------------|-------------------|-------------------|-------------------|-------------------|---------------------------------|
| rs1010                      | VAMP8  | (A:G) and (G:G) -- 1.75x risk of MI;<br>(A:A) -- normal                                                                                                                                                                                | 2   | 85581859    | T                   | C                 | G                 |                   |                   | CV,<br>FDCM,<br>NCM,<br>CM, DCM |
| rs12713559                  | APOB   | (C:T) -- carrier of possible familial<br>hypercholesterolemia mutation; (C:C)<br>-- normal                                                                                                                                             | 2   | 21,006,196  | G                   | A                 |                   |                   |                   | CV, LDL,<br>FHC,<br>HDL         |
| rs137852752                 | BMPR2  | (C:G) -- Pulmonary arterial<br>hypertension; (G:G) -- normal<br><br>(A:G) -- carrier of familial<br>hypercholesterolemia mutation; (A:A)<br>-- Dominant mutation associated with<br>Familial Hypercholesterolemia; (G:G) -<br>- normal | 2   | 202,556,361 | G                   | A                 | C                 |                   |                   | DCM, CM                         |
| rs144467873                 | APOB   | (A:G) -- Pulmonary arterial<br>hypertension; (G:G) -- normal                                                                                                                                                                           | 2   | 21,006,289  | G                   | A                 |                   |                   |                   | FHC                             |
| rs200948870                 | BMPR2  | (A:A) -- 1.5x increased risk of heart<br>attack and stroke but better emotional<br>memory and stop-go performance;<br>(C:C) -- normal                                                                                                  | 2   | 202,520,142 | G                   | A                 |                   |                   |                   | FHC                             |
| rs2229169                   | ADRA2B | (C:C) -- Slightly higher risk of ischemic<br>stroke; (A:A) -- lower risk of ischemic<br>stroke                                                                                                                                         | 2   | 96,114,968  | T                   | A                 | G                 |                   |                   | FHC                             |
| rs2943634                   |        | (A:G) and (A:A) -- slightly higher<br>blood pressure if Caucasian; (G:G) --<br>normal                                                                                                                                                  | 2   | 226,203,364 | A                   | C                 | G                 |                   |                   | IS,A                            |
| rs3754777                   | STK39  | (A:C) -- 1.3x higher risk for<br>hypertension; (A:A) -- >1.3x higher<br>risk for hypertension ; (C:C) -- normal                                                                                                                        | 2   | 168,159,404 | C                   | T                 |                   |                   |                   | CV, AA,<br>IS, HD               |
| rs3755351                   | ADD2   |                                                                                                                                                                                                                                        | 2   | 70,747,758  | G                   | T                 |                   |                   |                   | CV                              |

| Reference SNP<br>Cluster ID | Gene   | Genomic State                                                                                                                                                          | Chr | Location    | Ancestral<br>Allele | Variant<br>Allele | Variant<br>Allele | Variant<br>Allele | Variant<br>Allele | Disease         |
|-----------------------------|--------|------------------------------------------------------------------------------------------------------------------------------------------------------------------------|-----|-------------|---------------------|-------------------|-------------------|-------------------|-------------------|-----------------|
| rs4665058                   | BAZ2B  | (A:A) -- ~4x increased risk among<br>Europeans for sudden cardiac death;<br>(A:C) -- 2x increased risk among<br>Europeans for sudden cardiac death;<br>(C:C) -- normal | 2   | 159,333,698 | A                   | C                 |                   |                   |                   | CV              |
| rs557172581                 | BMPR2  | (A:G) -- Pulmonary arterial<br>hypertension; (G:G) -- normal                                                                                                           | 2   | 202,555,352 | G                   | A                 |                   |                   |                   | PH              |
| rs6749447                   | STK39  | (G:G) and (G:T) -- slightly higher<br>blood pressure if Caucasian; (T:T) --<br>normal                                                                                  | 2   | 168,184,876 | T                   | G                 |                   |                   |                   | CV, FHC,<br>LDL |
| rs700651                    | BOLL   | (A:G) -- ~1.11x increased risk of<br>intracranial aneurysm; (G:G) -- ~1.23x<br>increased risk of intracranial<br>aneurysm ; (A:A) -- normal                            | 2   | 197766990   | G                   | A                 |                   |                   |                   | FHC             |
| rs139794067                 | MYL3   | (A:G) -- familial hypertrophic<br>cardiomyopathy; (G:G) -- normal                                                                                                      | 3   | 46,860,813  | G                   | A                 | C                 | T                 |                   | CV, CM          |
| rs17300539                  | ADIPOQ | (G:G) -- increased risk of insulin<br>resistance; (A:G) -- normal                                                                                                      | 3   | 186841671   | G                   | A                 |                   |                   |                   | AA, IR          |
| rs1801282                   | PPARG  | (G:G) and (C:G) -- Unconfirmed<br>higher risk of cardiovascular disease<br>with high saturated fat diet; (C:C) --<br>normal fat metabolism                             | 3   | 12,351,626  | C                   | G                 |                   |                   |                   | FHC             |
| rs3900940                   | MYH15  | (C:C) and (C:T) -- slightly increased<br>risk of coronary heart disease; (T:T) --<br>normal                                                                            | 3   | 108,428,881 | T                   | A                 | C                 |                   |                   | FHC             |
| rs41261344                  | SCN5A  | (C:T) and (T:T) -- Probably benign;<br>previously, thought to confer possible<br>susceptibility to long QT syndrome;<br>(C:C) -- normal                                | 3   | 38,575,385  | C                   | T                 |                   |                   |                   | FHC             |

| Reference SNP<br>Cluster ID | Gene      | Genomic State                                                                                                                                                                                              | Chr | Location    | Ancestral<br>Allele | Variant<br>Allele | Variant<br>Allele | Variant<br>Allele | Variant<br>Allele | Disease         |
|-----------------------------|-----------|------------------------------------------------------------------------------------------------------------------------------------------------------------------------------------------------------------|-----|-------------|---------------------|-------------------|-------------------|-------------------|-------------------|-----------------|
| rs45620037                  | SCN5A     | (C:T) and (T:T) -- Now: Probably benign. Formerly: increased risk for dilated cardiomyopathy; (C:C) -- normal                                                                                              | 3   | 38,613,787  | G                   | A                 |                   |                   |                   | FHC             |
| rs5186                      | AGTR1     | (C:C) -- 7.3x increased risk of hypertension; (A:C) -- ~1.4x increased risk of hypertension; (A:A) -- normal                                                                                               | 3   | 148,742,201 | A                   | C                 |                   |                   |                   | ARR             |
| rs6797312                   | SERPINI1  | (A:A) and (A:T) -- 2x higher stroke risk in Caucasian women; (T:T) -- normal                                                                                                                               | 3   | 167,769,515 | A                   | T                 |                   |                   |                   | BS              |
| rs10033464                  | LPA       | (T:T) -- 1.4x increased risk of Atrial Fibrillation and cardioembolic stroke; (G:T) -- 1.28x increased risk of Atrial Fibrillation and cardioembolic stroke; (G:G) -- normal                               | 4   | 110,799,605 | T                   | G                 |                   |                   |                   | CV, HD, HDL     |
| rs1799895                   | SOD3      | (G:G) -- Lower risk for lung disease; Higher risk for ischemic heart disease ; (C:G) -- Slightly (~1.5x) higher relative risk for ischemic heart disease plus lower risk for lung disease; (C:C) -- normal | 4   | 24,800,212  | C                   | G                 |                   |                   |                   | IR              |
| rs2200733                   | LOC729065 | (C:T) -- 1.4x increased risk of Atrial Fibrillation and ischemic stroke; (T:T) 1.5x increased risk of Atrial Fibrillation and ischemic stroke; (C:C) -- normal                                             | 4   | 110,789,013 | C                   | T                 |                   |                   |                   | CV, IS          |
| rs2231137                   | ABCG2     | (G:G) -- Most common genotype, with slightly higher stroke risk; (A:A) and (A:G) -- normal                                                                                                                 | 4   | 88,139,962  | C                   | T                 |                   |                   |                   | CV, HD          |
| rs4961                      | ADD1      | (G:T) and (T:T) -- 1.8x increased risk for high blood pressure; (G:G) -- normal                                                                                                                            | 4   | 2,904,980   | G                   | A                 | T                 |                   |                   | CV, DL, HDL, ET |

| Reference SNP<br>Cluster ID | Gene              | Genomic State                                                                                                                                                                                     | Chr | Location    | Ancestral<br>Allele | Variant<br>Allele | Variant<br>Allele | Variant<br>Allele | Variant<br>Allele | Disease               |
|-----------------------------|-------------------|---------------------------------------------------------------------------------------------------------------------------------------------------------------------------------------------------|-----|-------------|---------------------|-------------------|-------------------|-------------------|-------------------|-----------------------|
| rs5335                      | EDNRA             | (G:G) and (C:G) -- Pulmonary arterial hypertension; (C:C) -- normal                                                                                                                               | 4   | 147,542,688 | G                   | A                 | C                 |                   |                   | HD                    |
| rs7439293                   | PALLD             | (A:A) and (A:G) -- increased risk of coronary heart disease; better response to statins; (G:G) -- normal                                                                                          | 4   | 168,756,335 | G                   | A                 |                   |                   |                   | IR                    |
| rs8192678                   | PPARGC1A          | (A:A) and (A:G) -- higher blood pressures if <50; (G:G) -- normal                                                                                                                                 | 4   | 23,814,039  | C                   | T                 |                   |                   |                   | PH                    |
| rs1800888                   | ADRB2             | (T:T) and (C:T) -- increased risk of coronary artery disease; (C:C) -- normal                                                                                                                     | 5   | 148,827,322 | C                   | T                 |                   |                   |                   | CV, T, IR, IS, PH, HS |
| rs1801020                   | F12, SLC34A1      | (C:T) and (T:T) -- 1.31x increased risk of heart disease                                                                                                                                          | 5   | 177,409,531 | A                   | G                 |                   |                   |                   | PH, CV, IS, T, AOC    |
| rs383830                    | F12, SLC34A1      | (A:A) -- 1.9x risk; (T:T) - normal                                                                                                                                                                | 5   | 100,613,278 | A                   | T                 |                   |                   |                   | IR                    |
| rs966221                    | PDE4D             | (C:C) -- 1.5x increased stroke risk; (T:T) -- normal                                                                                                                                              | 5   | 60,206,693  | A                   | G                 |                   |                   |                   | CV                    |
| rs1041981                   | LOC100287329, LTA | (A:A) -- Higher myocardial infarction risk; (C:C) -- normal                                                                                                                                       | 6   | 31,573,007  | C                   | A                 |                   |                   |                   | CV                    |
| rs10455872                  | LPA               | (G:G) -- 2.57x increased Coronary Heart disease risk; (A:G) -- 1.51x increased Coronary Heart disease risk; (A:A) -- normal                                                                       | 6   | 160,589,086 | A                   | G                 |                   |                   |                   | CV, FDCM, DCM         |
| rs1799945                   | HFE               | (C:G) -- One copy of H63D, carrier of hemochromatosis, likely unaffected unless also C282Y carrier.; (G:G) -- Two copies of H63D, likely affected by mild form of hemochromatosis; (C:C) - normal | 6   | 26,090,951  | C                   | G                 |                   |                   |                   | CV, AA, T, IS         |
| rs1800629                   | TNF               | (A:A) and (A:G) -- complex; generally higher risk for certain diseases; (G:G) - normal                                                                                                            | 6   | 31,575,254  | G                   | A                 |                   |                   |                   | IS                    |

| Reference SNP<br>Cluster ID | Gene    | Genomic State                                                                                                                                                                      | Chr | Location    | Ancestral<br>Allele | Variant<br>Allele | Variant<br>Allele | Variant<br>Allele | Variant<br>Allele | Disease               |
|-----------------------------|---------|------------------------------------------------------------------------------------------------------------------------------------------------------------------------------------|-----|-------------|---------------------|-------------------|-------------------|-------------------|-------------------|-----------------------|
| rs2076295                   | DSP     | (G:G) and (G:T) -- Slightly increased risk for pulmonary fibrosis; (T:T) -- normal                                                                                                 | 6   | 7,562,999   | T                   | G                 |                   |                   |                   | CV, IR, DCM, CM, SQTS |
| rs3798220                   | ApoA    | (C:C) and (C:T) -- 2-3x higher risk for cardiovascular events; (T:T) -- Normal                                                                                                     | 6   | 160,540,105 | T                   | C                 |                   |                   |                   | CV, LDL               |
| rs5370                      | EDN1    | (T:T) and (G:T) -- possibly lower HDL cholesterol in women; (G:G) -- normal                                                                                                        | 6   | 12296022    | G                   | T                 |                   |                   |                   | CV, ARR, LQTS         |
| rs6922269                   | MTHFD1L | (A:A) and (A:G) -- 1.2x risk of coronary artery disease; (G:G) -- normal                                                                                                           | 6   | 150,931,849 | G                   | A                 |                   |                   |                   | HDL                   |
| rs1137617                   | KCNH2   | (A:T) -- potential cardiac arrhythmia; (C:C), (C:T), and (T:T) -- normal                                                                                                           | 7   | 150,951,110 | A                   | C                 | G                 | T                 |                   | FHC                   |
| rs1799999                   | PPP1R3A | (T:T) -- insulin resistance; (G:G) -- normal                                                                                                                                       | 7   | 113878379   | C                   | A                 |                   |                   |                   | IS                    |
| rs1800796                   | IL6     | (C:C) and (C:G) -- Slightly increased risk for abdominal aortic aneurysm; (G:G) -- normal                                                                                          | 7   | 22,726,627  | G                   | C                 |                   |                   |                   | CM                    |
| rs662                       | PON1    | (A:A) -- 2x higher risk of CHD in some studies but lower in others; (A:G) -- elevated risk of CHD in some studies; (G:G) -- Conflicting results reported related to stroke and CAD | 7   | 95,308,134  | T                   | C                 |                   |                   |                   | FHC                   |
| rs6971091                   | FAM71F1 | (A:G) and (A:A) -- >2x increased risk for familial obesity; (G:G) -- normal                                                                                                        | 7   | 128723233   | G                   | A                 |                   |                   |                   | PH                    |
| rs854560                    | PON1    | (A:A) and (A:T) -- higher risk for heart disease, diabetic retinopathy; (T:T) -- normal                                                                                            | 7   | 95,316,772  | A                   | C                 | G                 | N                 | T                 | FHC                   |
| rs10958409                  |         | (A:G) -- ~1.37x increased risk of aneurysm; (A:A) -- ~1.79x increased risk of aneurysm ; (G:G) -- normal                                                                           | 8   | 54414531    | G                   | A                 |                   |                   |                   | FHC                   |

| Reference SNP<br>Cluster ID | Gene       | Genomic State                                                                                                                       | Chr | Location    | Ancestral<br>Allele | Variant<br>Allele | Variant<br>Allele | Variant<br>Allele | Variant<br>Allele | Disease                 |
|-----------------------------|------------|-------------------------------------------------------------------------------------------------------------------------------------|-----|-------------|---------------------|-------------------|-------------------|-------------------|-------------------|-------------------------|
| rs17482753                  | LPL        | (G:T) and (T:T) -- elevated<br>triglycerides; (G:G) -- normal                                                                       | 8   | 19,975,135  | G                   | T                 |                   |                   |                   | FHC                     |
| rs268                       |            | (A:G) and (G:G) --<br>3X increased risk for venous<br>thromboembolism; (A:A) -- normal                                              | 8   | 19,956,018  | A                   | G                 |                   |                   |                   | P, MVP,<br>M            |
| rs326                       |            | (A:A) and (A:G) -- lower HDL<br>cholesterol; (G:G) -- normal                                                                        | 8   | 19961928    | A                   | G                 |                   |                   |                   | BS                      |
| rs4994                      | ADRB3      | (C:C) and (C:T) -- 2x higher risk in<br>certain women for cardiac events;<br>(T:T) -- normal                                        | 8   | 37,966,280  | A                   | G                 |                   |                   |                   | ARVD                    |
| rs6997709                   | RP1        | (G:T) -- 1.2x higher risk for<br>hypertension; (G:G) -- 1.5x higher risk<br>for hypertension ; (T:T) -- normal                      | 8   | 139,167,781 | G                   | T                 |                   |                   |                   | AA                      |
| rs9298506                   |            | (A:G) -- ~1.21x increased risk of<br>aneurysm; (A:A) -- ~1.46x increased<br>risk of aneurysm ; (G:G) -- normal                      | 8   | 54524964    | A                   | G                 |                   |                   |                   | IS, S                   |
| rs10306114                  |            | (A:G) and (G:G) -- Higher risk of<br>bleeding during coronary<br>angiography?; (A:A) -- normal<br>(T:T) -- 1.54x increased risk for | 9   | 122,370,243 | A                   | G                 |                   |                   |                   | FHC,<br>LDL, DL,<br>HDL |
| rs10757272                  | CDKN2B-AS1 | Coronary artery disease; (C:T) -- 1.30x<br>increased risk for Coronary artery<br>disease; (C:C) -- normal                           | 9   | 22088261    | C                   | T                 |                   |                   |                   | CV, IS                  |
| rs10757274                  | CDKN2B-AS1 | (G:G) and (A:G) -- 1.2x increased risk<br>for heart disease; (A:A) -- normal                                                        | 9   | 22,096,056  | A                   | G                 |                   |                   |                   | CV, IS                  |



| Reference SNP<br>Cluster ID | Gene                  | Genomic State                                                                                                                                                                                                                                                                                                                                                                                                                                                                                                                                                                                                                                                                                                 | Chr | Location    | Ancestral<br>Allele | Variant<br>Allele | Variant<br>Allele | Variant<br>Allele | Variant<br>Allele | Disease             |
|-----------------------------|-----------------------|---------------------------------------------------------------------------------------------------------------------------------------------------------------------------------------------------------------------------------------------------------------------------------------------------------------------------------------------------------------------------------------------------------------------------------------------------------------------------------------------------------------------------------------------------------------------------------------------------------------------------------------------------------------------------------------------------------------|-----|-------------|---------------------|-------------------|-------------------|-------------------|-------------------|---------------------|
| rs10757278                  | CDKN2B-AS1            | (G:G) -- 1.6x increased risk for heart attack, 1.3x increased risk for abdominal aortic aneurysm and brain aneurysm; (A:G) -- 1.3x increased risk of heart attack, normal risk of aneurysm; (A:A) -- 0.78x reduced risk for CHD, 0.77x reduced for aneurysm (C:T) -- 1.24x increased myocardial infarction risk, ~1.24x increased intracranial aneurysm risk; (T:T) -- 1.52x increased myocardial infarction risk, ~1.54x increased intracranial aneurysm risk; (C:C) -- normal (A:C) -- 1.3x increased coronary artery disease risk; (C:C) -- 1.5x increased coronary artery disease risk; 2x increased; (A:A) -- normal (C:C) and (C:G) -- 1.5x increased risk for coronary artery disease; (G:G) -- normal | 9   | 22,124,478  | A                   | G                 |                   |                   |                   | CV, HD, IS          |
| rs1333040                   |                       |                                                                                                                                                                                                                                                                                                                                                                                                                                                                                                                                                                                                                                                                                                               | 9   | 22,083,405  | C                   | G                 | T                 |                   |                   | CV, A, AA, IS       |
| rs1333048                   |                       |                                                                                                                                                                                                                                                                                                                                                                                                                                                                                                                                                                                                                                                                                                               | 9   | 22,125,348  | A                   | C                 |                   |                   |                   | IS, HDL             |
| rs1333049                   |                       |                                                                                                                                                                                                                                                                                                                                                                                                                                                                                                                                                                                                                                                                                                               | 9   | 22,125,504  | G                   | C                 |                   |                   |                   | H, HBP              |
| rs2383206                   | CDKN2B-AS1            | (G:G) and (A:G) -- 1.4x increased risk for heart disease; (A:A) -- normal                                                                                                                                                                                                                                                                                                                                                                                                                                                                                                                                                                                                                                     | 9   | 22,115,027  | A                   | G                 |                   |                   |                   | CV, HD, HDL, IR, IS |
| rs2383207                   | CDKN2B-AS1            | (G:G) and (A:G) -- increased risk for heart disease; (A:A) -- normal                                                                                                                                                                                                                                                                                                                                                                                                                                                                                                                                                                                                                                          | 9   | 22,115,960  | A                   | G                 |                   |                   |                   | CV, HS, IS          |
| rs3217992                   | CDKN2B,<br>CDKN2B-AS1 | (A:A) and (A:G) -- 1.24x increased myocardial infarction risk; (G:G) -- normal                                                                                                                                                                                                                                                                                                                                                                                                                                                                                                                                                                                                                                | 9   | 22,003,224  | C                   | T                 |                   |                   |                   | IS                  |
| rs3842787                   | PTGS1                 | (T:T) and (C:T) -- Higher risk of bleeding during coronary angiography; (C:C) -- normal                                                                                                                                                                                                                                                                                                                                                                                                                                                                                                                                                                                                                       | 9   | 122,371,228 | C                   | T                 |                   |                   |                   | HDL, DL             |

| Reference SNP<br>Cluster ID | Gene       | Genomic State                                                                                                                                                                                                           | Chr | Location    | Ancestral<br>Allele | Variant<br>Allele | Variant<br>Allele | Variant<br>Allele | Variant<br>Allele | Disease    |
|-----------------------------|------------|-------------------------------------------------------------------------------------------------------------------------------------------------------------------------------------------------------------------------|-----|-------------|---------------------|-------------------|-------------------|-------------------|-------------------|------------|
| rs4977574                   | CDKN2B-AS1 | (G:G) -- Most studies show a somewhat elevated risk for myocardial infarction; (A:G) -- Some studies, but not others, report slightly increased risk for MI; (A:A) -- normal                                            | 9   | 22,098,575  | A                   | G                 | T                 |                   |                   | IS         |
| rs4986790                   | TLR4       | (G:G) -- complex; numerous associations reported; (A:A) and (A:G) -- normal                                                                                                                                             | 9   | 117,713,024 | A                   | G                 | T                 |                   |                   | FHC        |
| rs7025486                   | DAB2IP     | (A:G) -- slight (1.2x) increase in risk for abdominal aortic aneurysm and some vascular disorders; (A:A) -- slight (1.4x) increase in risk for abdominal aortic aneurysm and other vascular disorders ; (G:G) -- normal | 9   | 121660124   | G                   | A                 |                   |                   |                   | H, HBP, CV |
| rs1746048                   |            | (C:C) -- 1.03 increased risk for coronary heart disease; (C:T) and (T:T) -- normal                                                                                                                                      | 10  | 44,280,376  | C                   | T                 |                   |                   |                   | H, HBP     |
| rs4244285                   | CYP2C19    | (A:G) and (A:A) -- poor metabolizer of several popular medicines; patients prescribed Plavix get less benefit, and have higher risk for adverse cardiovascular events; (G:G) -- normal                                  | 10  | 94781859    | G                   | A                 | C                 |                   |                   | FHC        |
| rs45487699                  | LDB3       | (C:T) -- left ventricular noncompaction; (C:C) -- normal                                                                                                                                                                | 10  | 86,681,680  | C                   | T                 |                   |                   |                   | CM         |
| rs501120                    |            | (A:A) and (A:G) -- 1.3x increased risk for heart disease; (C:C) and (G:G) normal                                                                                                                                        | 10  | 44,258,419  | T                   | C                 |                   |                   |                   | H, HBP     |
| rs7080536                   | HABP2      | (A:G) -- ~2x higher risk for carotid stenosis, venous thromboembolism; (A:A) -- significant increase (2 - 6x?) in risk possible for carotid stenosis, stroke and venous thromboembolism; (G:G) -- normal                | 10  | 113588287   | G                   | A                 |                   |                   |                   | S          |

| Reference SNP<br>Cluster ID | Gene   | Genomic State                                                                                                                                                                                                                                                                                                                                                                                                                                                                                                                                                                                                         | Chr | Location    | Ancestral<br>Allele | Variant<br>Allele | Variant<br>Allele | Variant<br>Allele | Variant<br>Allele | Disease                        |
|-----------------------------|--------|-----------------------------------------------------------------------------------------------------------------------------------------------------------------------------------------------------------------------------------------------------------------------------------------------------------------------------------------------------------------------------------------------------------------------------------------------------------------------------------------------------------------------------------------------------------------------------------------------------------------------|-----|-------------|---------------------|-------------------|-------------------|-------------------|-------------------|--------------------------------|
| rs11570112                  | MYBPC3 | (C:G) -- interpretation problematic vis-<br>a-vis cardiomyopathy for several<br>reasons; (C:C) -- normal                                                                                                                                                                                                                                                                                                                                                                                                                                                                                                              | 11  | 47,333,924  | G                   | A                 | C                 |                   |                   | H, HBP                         |
| rs1799963                   | F2     | (A:A) and (A:G) -- Pulmonary arterial<br>hypertension; (G:G) -- normal                                                                                                                                                                                                                                                                                                                                                                                                                                                                                                                                                | 11  | 46,739,505  | G                   | A                 |                   |                   |                   | CV, DL,<br>LDL,<br>HDL,<br>HVD |
| rs1800497                   | ANKK1  | (C:T) -- A1/A2: Bad at avoidance of<br>errors. 0.5x lower OCD risk, 0.87x<br>lower Tardive Diskinesia risk, higher<br>ADHD risk. More Alcohol<br>Dependence. Lower risk of<br>Postoperative Nausea. Increased<br>obesity. Bupropion is not effective for<br>smoking cessation.; (T:T) -- A1/A1:<br>Bad at avoidance of errors. 0.25x lower<br>OCD; 0.56x lower Tardive Diskinesia;<br>higher ADHD; 1.4x Alcohol<br>Dependence; lower Postoperative<br>Nausea; Increased obesity; less<br>pleasure response; Bupropion<br>ineffective for smoking cessation.; 2.4x<br>risk for adenoma recurrence.; (C:C) --<br>normal | 11  | 113,400,106 | G                   | A                 |                   |                   |                   | CV, HD, T                      |
| rs187238                    | IL18   | (G:G) -- hypertension increases risk<br>3.75x for sudden cardiac death; (C:C)<br>and (C:G) -- normal                                                                                                                                                                                                                                                                                                                                                                                                                                                                                                                  | 11  | 112,164,265 | C                   | A                 | G                 |                   |                   | CV, IS                         |
| rs190228518                 | MYBPC3 | (T:G) -- Familial hypertrophic<br>cardiomyopathy (possible); (G:G) --<br>normal                                                                                                                                                                                                                                                                                                                                                                                                                                                                                                                                       | 11  | 47343070    | G                   | A                 | T                 |                   |                   | HDL                            |
| rs201457110                 | DCHS1  | (C:T) -- Mitral valve prolapse;(C:C) --<br>normal                                                                                                                                                                                                                                                                                                                                                                                                                                                                                                                                                                     | 11  | 6624138     | C                   | T                 |                   |                   |                   | CV, IS                         |

| Reference SNP<br>Cluster ID | Gene    | Genomic State                                                                                                                                                                     | Chr | Location    | Ancestral<br>Allele | Variant<br>Allele | Variant<br>Allele | Variant<br>Allele | Variant<br>Allele | Disease               |
|-----------------------------|---------|-----------------------------------------------------------------------------------------------------------------------------------------------------------------------------------|-----|-------------|---------------------|-------------------|-------------------|-------------------|-------------------|-----------------------|
| rs3781719                   | CALCA   | (C:C) and (C:T) -- 2x increased hypertension risk; (T:T) -- normal                                                                                                                | 11  | 14,972,978  | A                   | G                 |                   |                   |                   | PH                    |
| rs662799                    | APOA5   | (G:G) -- 2x higher early heart attack risk; less weight gain on high fat diets; (A:G) -- 1.4x higher early heart attack risk; less weight gain on high fat diets; (A:A) -- normal | 11  | 116,792,991 | G                   | A                 |                   |                   |                   | CV, BS, CM            |
| rs964184                    | ZPR1    | (G:G) -- increased risk of hypertriglyceridemia; (C:C) -- normal                                                                                                                  | 11  | 116,778,201 | G                   | C                 |                   |                   |                   | T, CV                 |
| rs104894368                 | MYL2    | (A:G) -- Familial hypertrophic cardiomyopathy (possible); (G:G) -- normal                                                                                                         | 12  | 110919133   | C                   | A                 | G                 | T                 |                   | CV, AOC, DL, LDL, AA  |
| rs3794260                   | WSCD2   | (A:G) -- 1.26x higher risk for hypertension; (A:A) -- >1.26x higher risk for hypertension ; (G:G) -- normal                                                                       | 12  | 108,204,497 | G                   | A                 |                   |                   |                   | CV, AA, DL, LDL, HDL  |
| rs7961152                   | BCAT1   | (A:C) -- 1.2x higher risk for hypertension; (A:A) -- 1.5x higher risk for hypertension ; (C:C) -- normal                                                                          | 12  | 248,286,77  | A                   | C                 |                   |                   |                   | DCM, FDCM, CM, NCM    |
| rs9739493                   | WSCD2   | (C:C) and (C:T) -- higher risk for hypertension ; (T:T) -- normal                                                                                                                 | 12  | 108,250,412 | T                   | C                 | G                 |                   |                   | CV, FDCM, BS, DCM, CM |
| rs10507391                  | ALOX5AP | (A:T) and (T:T) -- 1.24x increased stroke risk for males                                                                                                                          | 13  | 30,737,959  | A                   | T                 |                   |                   |                   | HD                    |
| rs9315204                   | STARD13 | (T:T) -- higher risk of aneurysm; (C:C) -- normal                                                                                                                                 | 13  | 33119700    | C                   | T                 |                   |                   |                   | CV, LDL, HS, H, HBP   |
| rs1048990                   | PSMA6   | (C:C) -- > 1.48x risk; (C:G) -- 1.48x risk;                                                                                                                                       | 14  | 35,292,469  | C                   | G                 | T                 |                   |                   | IR                    |
| rs121917809                 | PSEN1   | (A:G) -- Primary dilated cardiomyopathy; (A:A) -- normal                                                                                                                          | 14  | 73,211,811  | A                   | G                 | T                 |                   |                   | CV                    |

| Reference SNP<br>Cluster ID | Gene  | Genomic State                                                                                                                               | Chr | Location    | Ancestral<br>Allele | Variant<br>Allele | Variant<br>Allele | Variant<br>Allele | Variant<br>Allele | Disease                               |
|-----------------------------|-------|---------------------------------------------------------------------------------------------------------------------------------------------|-----|-------------|---------------------|-------------------|-------------------|-------------------|-------------------|---------------------------------------|
| rs3783799                   | PRKCH | (A:A) and (A:G) -- 1.4x increased risk<br>for stroke; (G:G) -- normal                                                                       | 14  | 614,524,988 | C                   | T                 |                   |                   |                   | CV, IR,<br>HDL, IS,<br>DCM, PH,<br>IS |
| rs841                       | GCH1  | (T:T) -- decreased baroreflex<br>sensitivity, heart rate variability, and<br>in women, hypertension; (C:C) --<br>normal                     | 14  | 54,843,774  | G                   | A                 |                   |                   |                   | CV, IS                                |
| rs111671429                 | FBN1  | (C:G) -- Marfan syndrome<br>mutation; (C:C) -- normal                                                                                       | 15  | 48596311    | G                   | A                 | C                 |                   |                   | CV, IS,<br>HD                         |
| rs17228212                  | SMAD3 | (C:C) and (C:T) -- ~1.3x increased risk<br>for heart disease; (T:T) -- normal                                                               | 15  | 67,166,301  | T                   | C                 |                   |                   |                   | LDL                                   |
| rs2118181                   | FBN1  | (C:T) -- X1.32 higher risk of thoracic<br>aortic dissection; (C:C) -- X1.8 higher<br>risk of Thoracic aortic dissection; (T:T)<br>-- normal | 15  | 48623687    | T                   | C                 |                   |                   |                   | IS, CM, H,<br>HBP, CA                 |
| rs13333226                  | UMOD  | (A:A) -- common but slightly higher<br>risk for hypertension; (A:G) and (G:G)<br>-- normal                                                  | 16  | 20,354,332  | A                   | G                 |                   |                   |                   | PH                                    |
| rs1421085                   | FTO   | (C:T) -- ~1.3x increased obesity risk ;<br>(C:C) -- ~1.7x increased obesity risk;<br>(T:T) -- normal                                        | 16  | 53767042    | T                   | C                 |                   |                   |                   | IS, AOC, T                            |
| rs17817449                  | FTO   | (G:T) -- ~1.3x increased obesity risk;<br>(G:G) -- ~1.7x increased obesity risk;<br>(T:T) -- normal                                         | 16  | 53779455    | T                   | A                 | G                 |                   |                   | HDL                                   |
| rs183130                    | CETP  | (C:C) and (C:T) -- lower HDL<br>cholesterol; (T:T) -- normal                                                                                | 16  | 56,957,451  | C                   | T                 |                   |                   |                   | FHC                                   |
| rs8055236                   | CDH13 | (G:G) -- common, but 2.2x higher risk<br>for heart disease; (G:T) -- 1.9x risk for<br>heart disease; (T:T) -- normal                        | 16  | 83,178,793  | G                   | A                 | C                 | T                 |                   | FHC, CM                               |

| Reference SNP<br>Cluster ID | Gene   | Genomic State                                                                             | Chr | Location   | Ancestral<br>Allele | Variant<br>Allele | Variant<br>Allele | Variant<br>Allele | Variant<br>Allele | Disease               |
|-----------------------------|--------|-------------------------------------------------------------------------------------------|-----|------------|---------------------|-------------------|-------------------|-------------------|-------------------|-----------------------|
| rs9934438                   | VKORC1 | (A:A) -- coumadin resistance; (G:G) -- normal                                             | 16  | 31,093,557 | G                   | A                 | C                 |                   |                   | FHC                   |
| rs1024611                   | CCL2   | (C:C) and (C:T) -- increased risk of exercise induced ischemia, (T:T) -- normal           | 17  | 34,252,769 | A                   | G                 |                   |                   |                   | FHC                   |
| rs34210653                  | ALOX15 | (C:T) -- 1.6x increased risk for heart disease; (C:C) -- normal                           | 17  | 4,632,019  | G                   | A                 |                   |                   |                   | PH                    |
| rs4969168                   | SOCS3  | (A:A) -- Obesity and/or Insulin resistance associations                                   | 17  | 78357712   | A                   | G                 |                   |                   |                   | NCM, CM               |
| rs5918                      | ITGB3  | (C:C) and (C:T) -- MI risk; (T:T) -- normal                                               | 17  | 47,283,364 | T                   | C                 |                   |                   |                   | FHC                   |
| rs76992529                  | TTR    | (A:A) and (A:G) -- TTR-related cardiac amyloidosis; (G:G) -- normal                       | 18  | 31,598,655 | G                   | A                 |                   |                   |                   | FHC                   |
| rs10413089                  |        | (C:C) -- susceptibility to low HDL-cholesterol                                            | 19  | 44,952,331 | T                   | C                 |                   |                   |                   | FHC                   |
| rs13306512                  | LDLR   | (A:C) and (C:G) -- Familial Hypercholesterolemia; (C:C) -- normal                         | 19  | 11,107,513 | C                   | A                 | G                 | T                 |                   | FHC                   |
| rs13306515                  | LDLR   | (A:C) and (C:G) -- Familial Hypercholesterolemia; (C:C) -- normal                         | 19  | 11,110,767 | C                   | A                 | G                 | T                 |                   | IS, AOC, T            |
| rs137853964                 | LDLR   | (G:T) -- Familial hypercholesterolemia; (G:G) -- normal                                   | 19  | 11,129,602 | G                   | A                 | T                 |                   |                   | FHC, CM               |
| rs139361635                 | LDLR   | (A:G) and (G:T) -- Familial Hypercholesterolemia; (G:G) -- normal                         | 19  | 11,110,735 | G                   | A                 | C                 | T                 |                   | CV, DL, HD, LDL, AA   |
| rs146651743                 | LDLR   | (A:C) and (C:G) -- Familial Hypercholesterolemia; (C:C) -- normal                         | 19  | 11,107,402 | C                   | A                 | G                 | T                 |                   | CV, AOC, T, PH, IS, S |
| rs146675823                 | LDLR   | (A:G) -- Dominant mutation associated with Familial Hypercholesterolemia; (G:G) -- normal | 19  | 11,102,706 | G                   | A                 | T                 |                   |                   | DCM, CM               |

| Reference SNP<br>Cluster ID | Gene  | Genomic State                                                                                       | Chr | Location   | Ancestral<br>Allele | Variant<br>Allele | Variant<br>Allele | Variant<br>Allele | Variant<br>Allele | Disease                      |
|-----------------------------|-------|-----------------------------------------------------------------------------------------------------|-----|------------|---------------------|-------------------|-------------------|-------------------|-------------------|------------------------------|
| rs150673992                 | LDLR  | (C:T) -- Familial<br>Hypercholesterolemia; (C:C) -- normal                                          | 19  | 11,106,627 | C                   | T                 |                   |                   |                   | CV, DL,<br>LDL               |
| rs172149856                 | TRPM4 | (A:G) -- May - or may not - lead to<br>progressive familial heart block type<br>1B; (G:G) -- normal | 19  | 49188641   | G                   | A                 |                   |                   |                   | CV, M,<br>DL, IR,<br>HDL, IS |
| rs1800437                   | GIPR  | (C:G) -- 0.72x risk for heart disease;<br>(C:C) and (G:G) -- normal                                 | 19  | 45,678,134 | G                   | C                 |                   |                   |                   | CV,<br>DL ,HDL,<br>IS, O, HD |
| rs185098634                 | LDLR  | (C:T) -- Familial<br>Hypercholesterolemia; (C:C) -- normal                                          | 19  | 11,116,873 | C                   | T                 |                   |                   |                   | CV, HBP,<br>H                |
| rs200533979                 | LDLR  | (A:C) -- Familial<br>Hypercholesterolemia; (C:C) -- normal                                          | 19  | 11,111,541 | C                   | A                 | T                 |                   |                   | IS, S, HDL                   |
| rs201016593                 | LDLR  | (A:G) -- Familial<br>Hypercholesterolemia; (G:G) -- normal                                          | 19  | 11,089,559 | G                   | A                 |                   |                   |                   | HD                           |
| rs201102461                 | LDLR  | (A:G) -- Familial<br>Hypercholesterolemia; (G:G) -- normal                                          | 19  | 11,105,250 | G                   | A                 |                   |                   |                   | CV, HD                       |
| rs201102492                 | LDLR  | (A:G) and (G:T) -- Familial<br>Hypercholesterolemia; (G:G) -- normal                                | 19  | 11,116,937 | G                   | A                 | T                 |                   |                   | O                            |
| rs201907325                 | TRPM4 | (A:G) -- Progressive familial heart<br>block type 1B (Brugada syndrome);<br>(G:G) -- normal         | 19  | 49182608   | G                   | A                 | T                 |                   |                   | IS, PH,<br>CM                |
| rs2228671                   | LDLR  | (A:C) and (C:G) -- Familial<br>Hypercholesterolemia; (C:C) and (C:T)<br>-- normal                   | 19  | 11,100,236 | C                   | A                 | G                 | T                 |                   | H, HBP                       |
| rs369943481                 | LDLR  | (A:C) -- Familial<br>Hypercholesterolemia; (C:C) -- normal                                          | 19  | 11,120,454 | C                   | A                 | T                 |                   |                   | A                            |
| rs376207800                 | LDLR  | (C:G) and (C:T) -- Familial<br>Hypercholesterolemia; (C:C) -- normal                                | 19  | 11,100,340 | C                   | G                 | T                 |                   |                   | AA, A,<br>PH, IS             |

| Reference SNP<br>Cluster ID | Gene  | Genomic State                                                                                                                          | Chr | Location   | Ancestral<br>Allele | Variant<br>Allele | Variant<br>Allele | Variant<br>Allele | Variant<br>Allele | Disease                   |
|-----------------------------|-------|----------------------------------------------------------------------------------------------------------------------------------------|-----|------------|---------------------|-------------------|-------------------|-------------------|-------------------|---------------------------|
| rs429358                    | APOE  | (C:C) -- one of 2 snps relevant to<br>classifying APOE genotype; (C:T) --<br>1.4x increased risk for heart disease;<br>(T:T) -- Normal | 19  | 44,908,684 | T                   | C                 |                   |                   |                   | T                         |
| rs4420638                   | APOC1 | (G:G) and (A:G) -- 1.4x increased risk<br>of heart disease; (A:A) -- Normal                                                            | 19  | 44,919,689 | A                   | G                 |                   |                   |                   | HD                        |
| rs540073140                 | LDLR  | (C:T) -- Familial<br>Hypercholesterolemia; (C:C) -- normal                                                                             | 19  | 11,110,780 | C                   | T                 |                   |                   |                   | FHC                       |
| rs544453230                 | LDLR  | (A:G) -- Familial<br>Hypercholesterolemia; (G:G) -- normal                                                                             | 19  | 11,110,714 | G                   | A                 | C                 |                   |                   | DCM,<br>FDCM,<br>CM, NCM  |
| rs551747280                 | LDLR  | (A:G) and (G:T) -- Familial<br>Hypercholesterolemia; (G:G) -- normal                                                                   | 19  | 11,100,237 | G                   | A                 | T                 |                   |                   | CV, IS                    |
| rs552422789                 | LDLR  | (A:C) and (C:G) -- Familial<br>Hypercholesterolemia; (G:G) -- normal                                                                   | 19  | 11,113,308 | G                   | A                 | C                 |                   |                   | CV, CM,<br>CAM            |
| rs563382937                 | LDLR  | (A:T) -- Familial<br>Hypercholesterolemia; (A:A) -- normal                                                                             | 19  | 11,120,198 | A                   | G                 | T                 |                   |                   | CV,<br>FDCM,<br>RCM       |
| rs563390335                 | LDLR  | (C:T) -- Familial<br>Hypercholesterolemia; (C:C) -- normal                                                                             | 19  | 11,102,777 | C                   | A                 | T                 |                   |                   | H, HBP                    |
| rs570942190                 | LDLR  | (C:T) -- Familial<br>Hypercholesterolemia; (C:C) -- normal                                                                             | 19  | 11,113,337 | C                   | T                 |                   |                   |                   | HD                        |
| rs577934998                 | LDLR  | (G:T) and (C:T) -- Familial<br>Hypercholesterolemia; (T:T) -- normal                                                                   | 19  | 11,105,570 | T                   | C                 | G                 |                   |                   | CV, IR,<br>CM             |
| rs5933                      | LDLR  | (C:G) -- Familial<br>Hypercholesterolemia; (C:C) -- normal                                                                             | 19  | 11,113,414 | C                   | G                 | T                 |                   |                   | IS                        |
| rs7250581                   | SEZ6L | (G:G) -- 1.4x risk; (A:A) and (A:G) --<br>normal                                                                                       | 19  | 29,573,489 | A                   | G                 |                   |                   |                   | CV, IR,<br>HDL, IS,<br>HC |



| Reference SNP<br>Cluster ID | Gene  | Genomic State                                                                                         | Chr | Location   | Ancestral<br>Allele | Variant<br>Allele | Variant<br>Allele | Variant<br>Allele | Variant<br>Allele | Disease            |
|-----------------------------|-------|-------------------------------------------------------------------------------------------------------|-----|------------|---------------------|-------------------|-------------------|-------------------|-------------------|--------------------|
| rs72658860                  | LDLR  | (A:G) -- Familial<br>Hypercholesterolemia; (G:G) -- normal                                            | 19  | 11,110,681 | G                   | A                 |                   |                   |                   | A                  |
| rs77615401                  | TNNI3 | (A:A) and (A:G) -- Familial<br>hypertrophic cardiomyopathy, type 7<br>(possibly); (G:G) -- normal     | 19  | 55,156,239 | G                   | A                 |                   |                   |                   | A                  |
| rs3843763                   | PLTP  | (T:T) and (C:T) -- Slightly lower HDL<br>("Good") Cholesterol; (C:C) -- normal                        | 20  | 45,919,554 | C                   | T                 |                   |                   |                   | IS, HS,<br>DL, HDL |
| rs1041740                   | SOD1  | (T:T) -- Slight increase in<br>cardiovascular risk; (C:C) -- normal                                   | 21  | 31,667,849 | C                   | T                 |                   |                   |                   | IS                 |
| rs1805127                   | KCNE1 | (A:G) -- slight increase in risk for atrial<br>fibrillation; (A:A) -- normal                          | 21  | 34,449,523 | T                   | C                 |                   |                   |                   | H, HBP             |
| rs688034                    | SEZ6L | (T:T) -- 1.6x risk; (C:T) -- 1.1x risk<br>higher risk for coronary artery disease;<br>(C:C) -- normal | 22  | 26,293,669 | C                   | T                 |                   |                   |                   | CV                 |
